# Supplementary figures and images for: Flaxseed Supplementation in Chicken Feed Accelerates Salmonella enterica subsp. enterica Serovar Enteritidis Clearance, Modulates Cecum Microbiota, and Influences Ovarian Gene Expression in Laying Hens
Source: MDPI journal article supplement (doi:10.3390/biom13091353), 2023-09-06

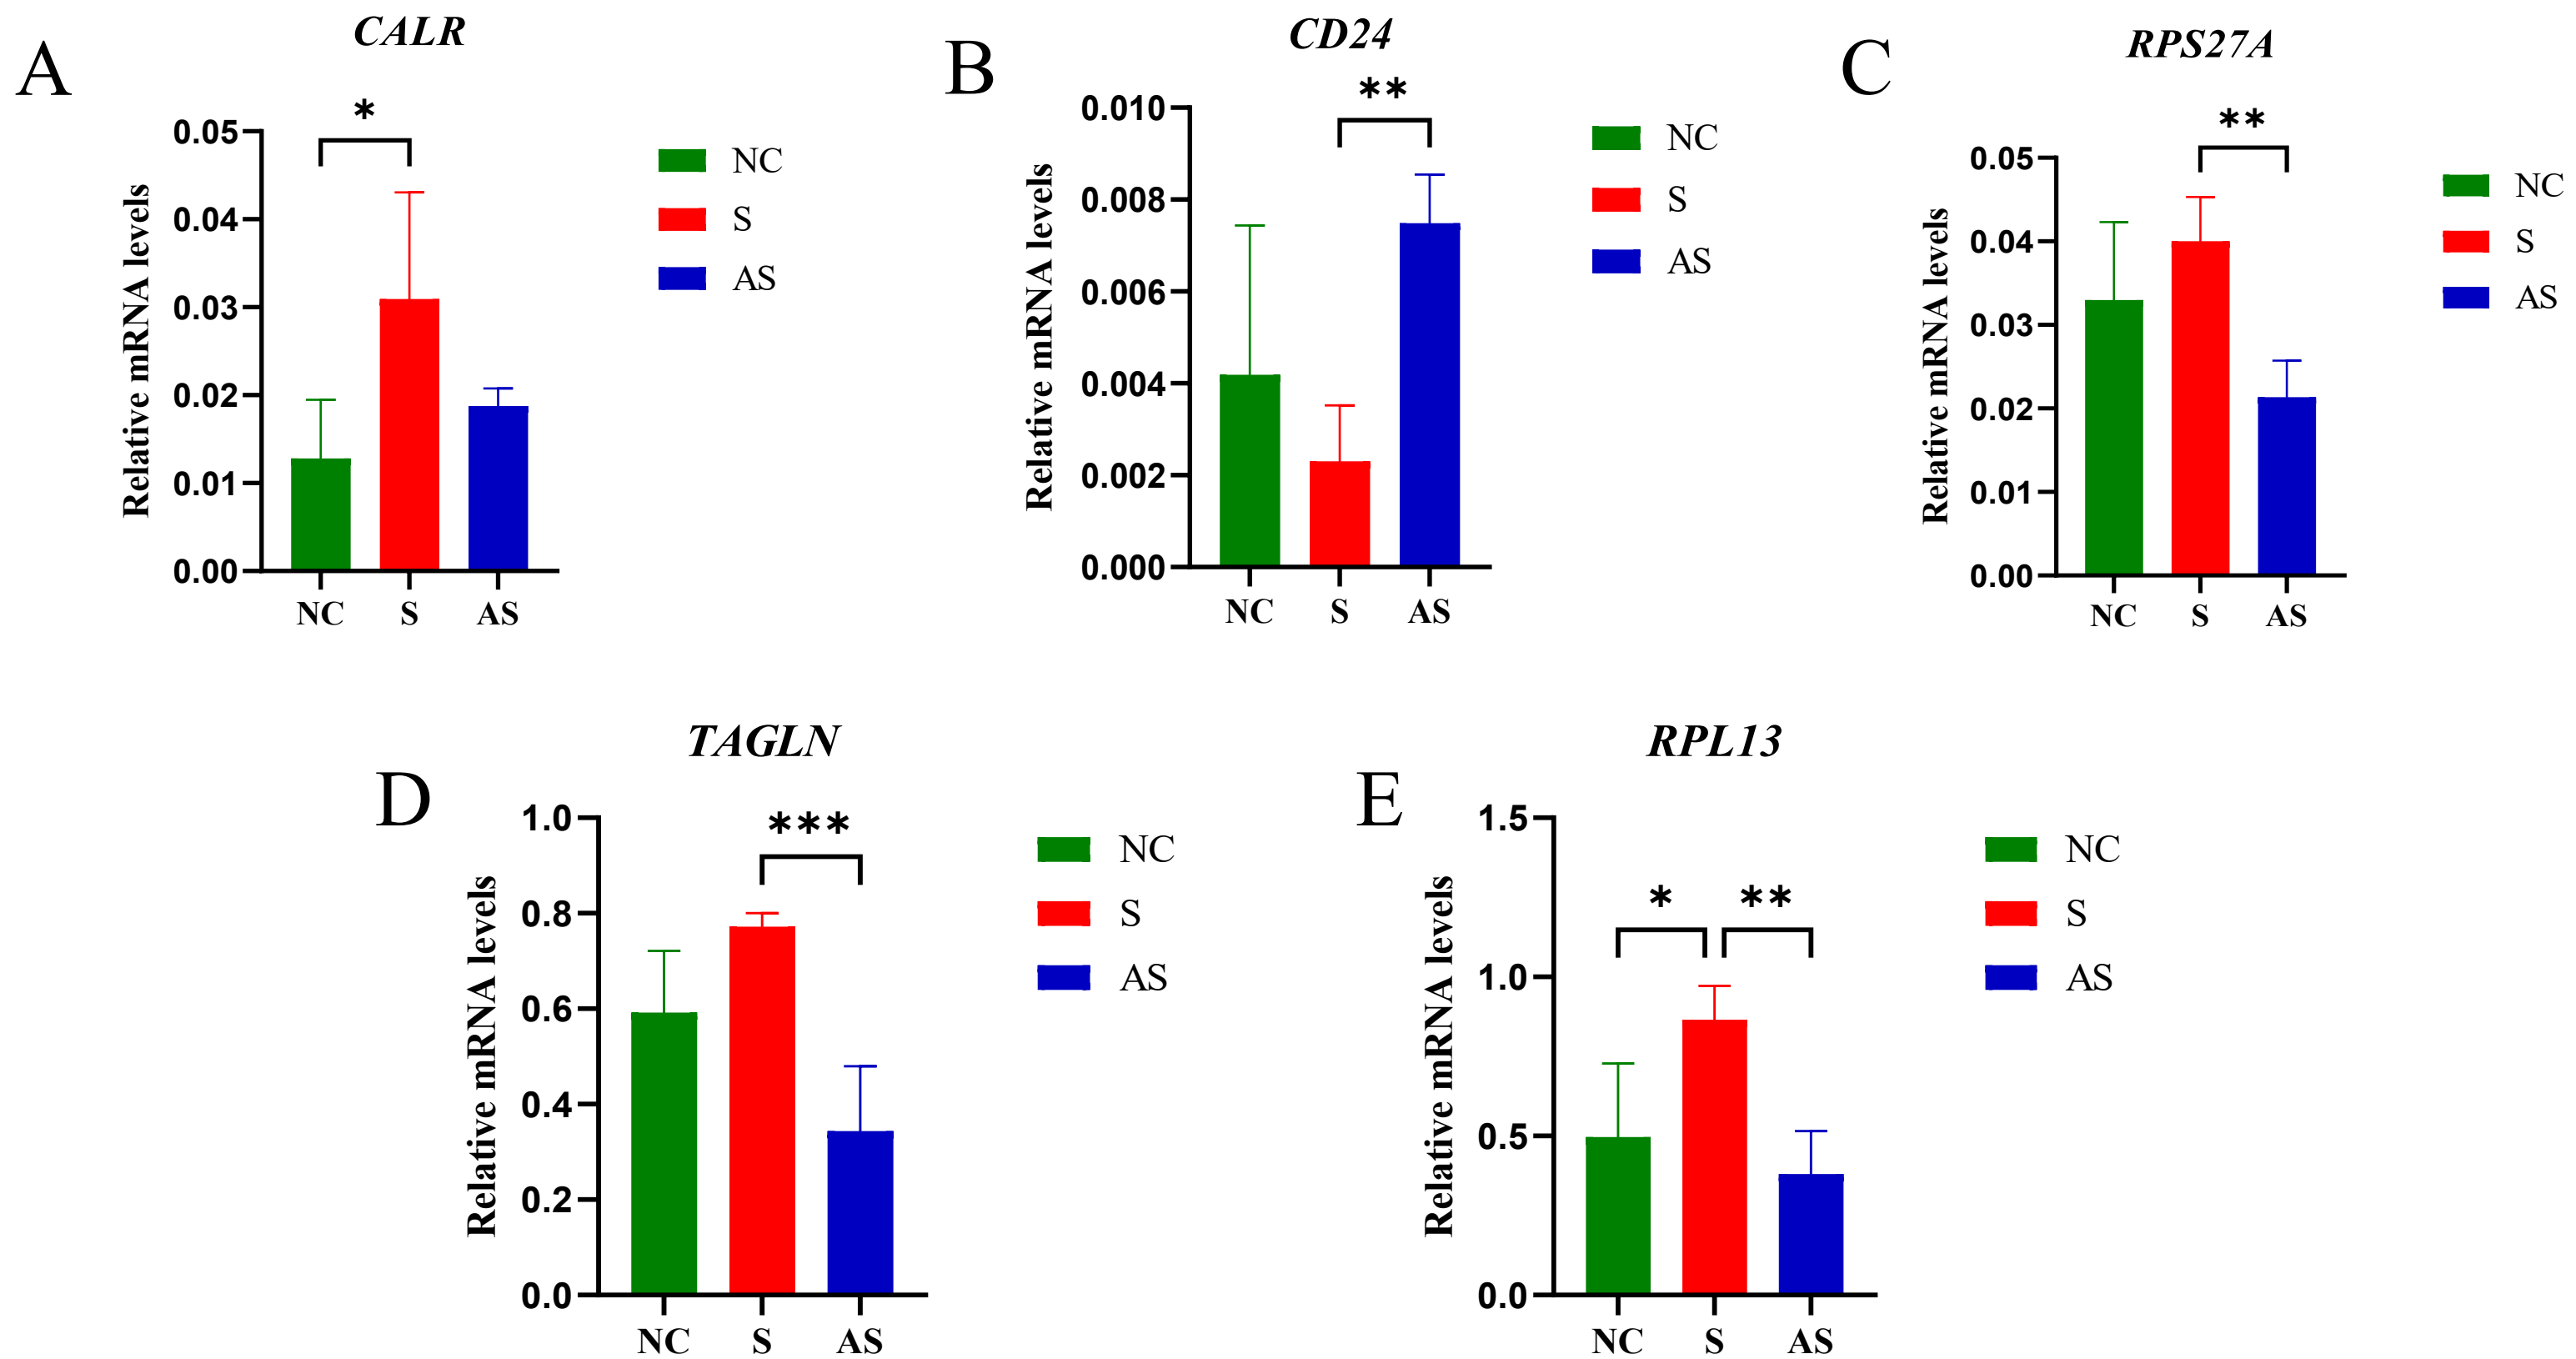

Supplement: s1 [file s1]

A

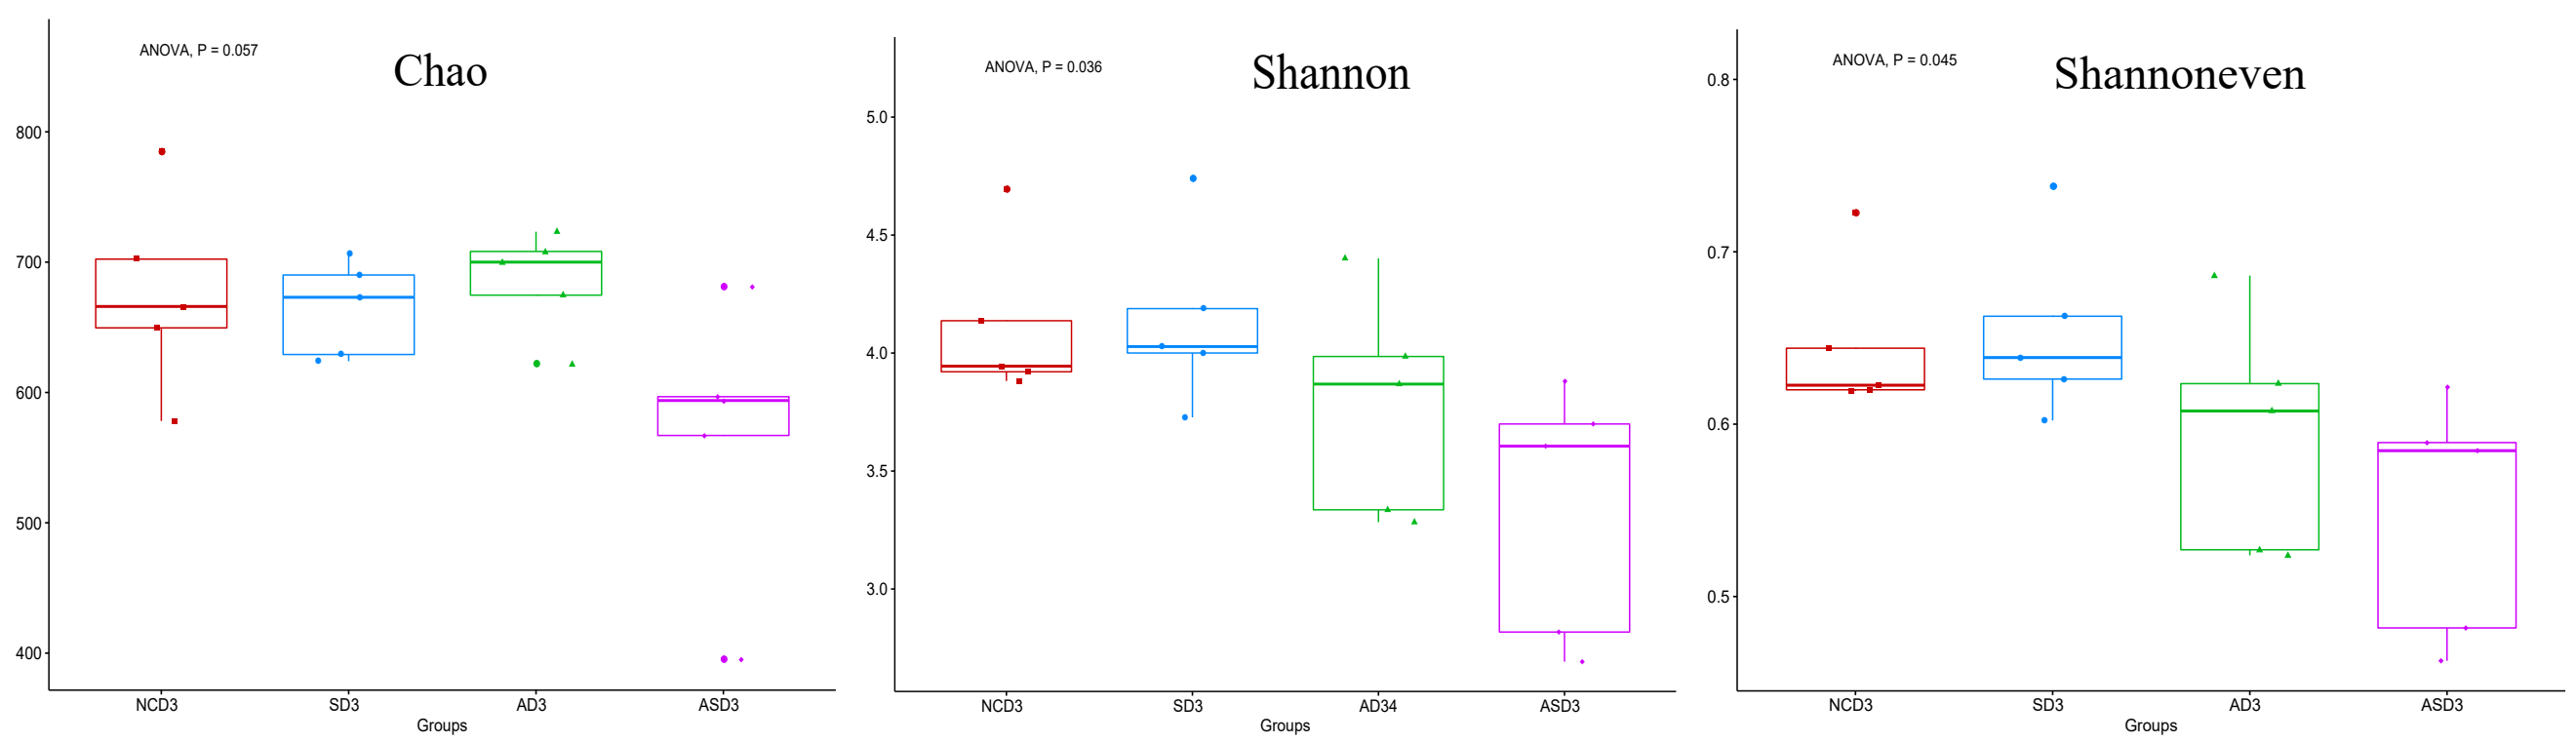

B

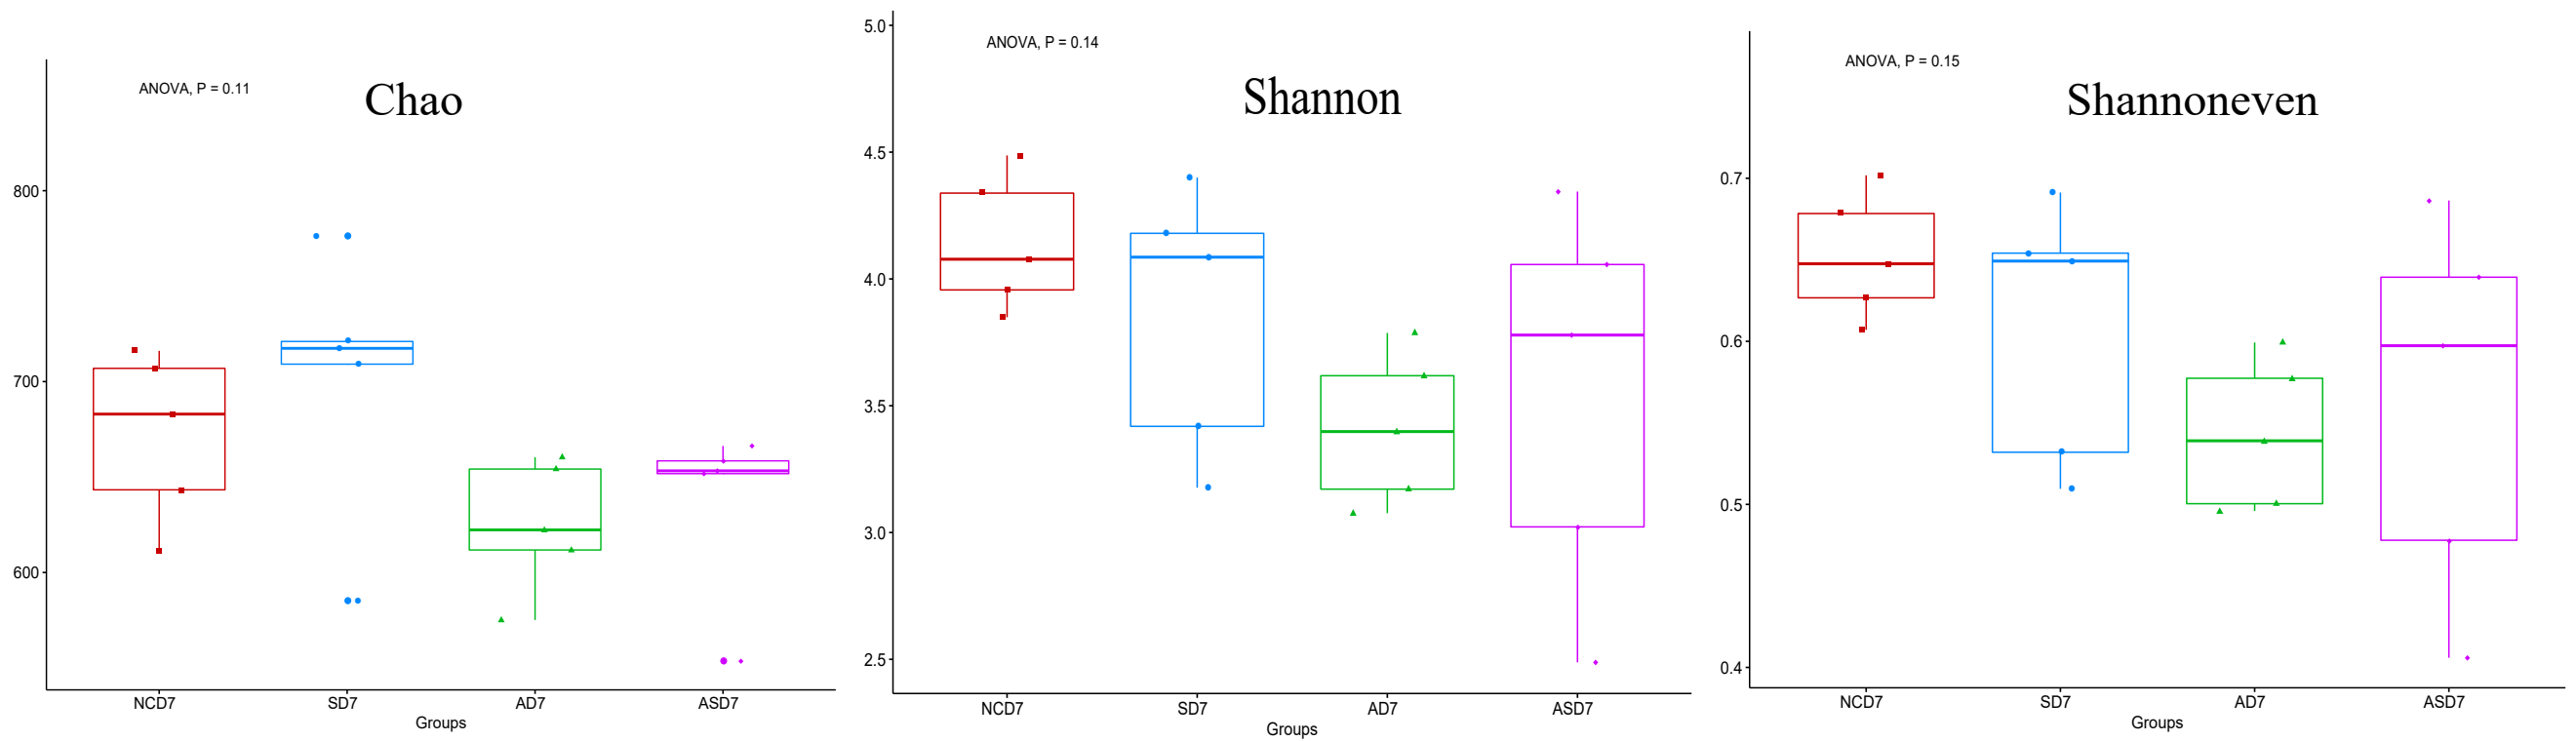

C

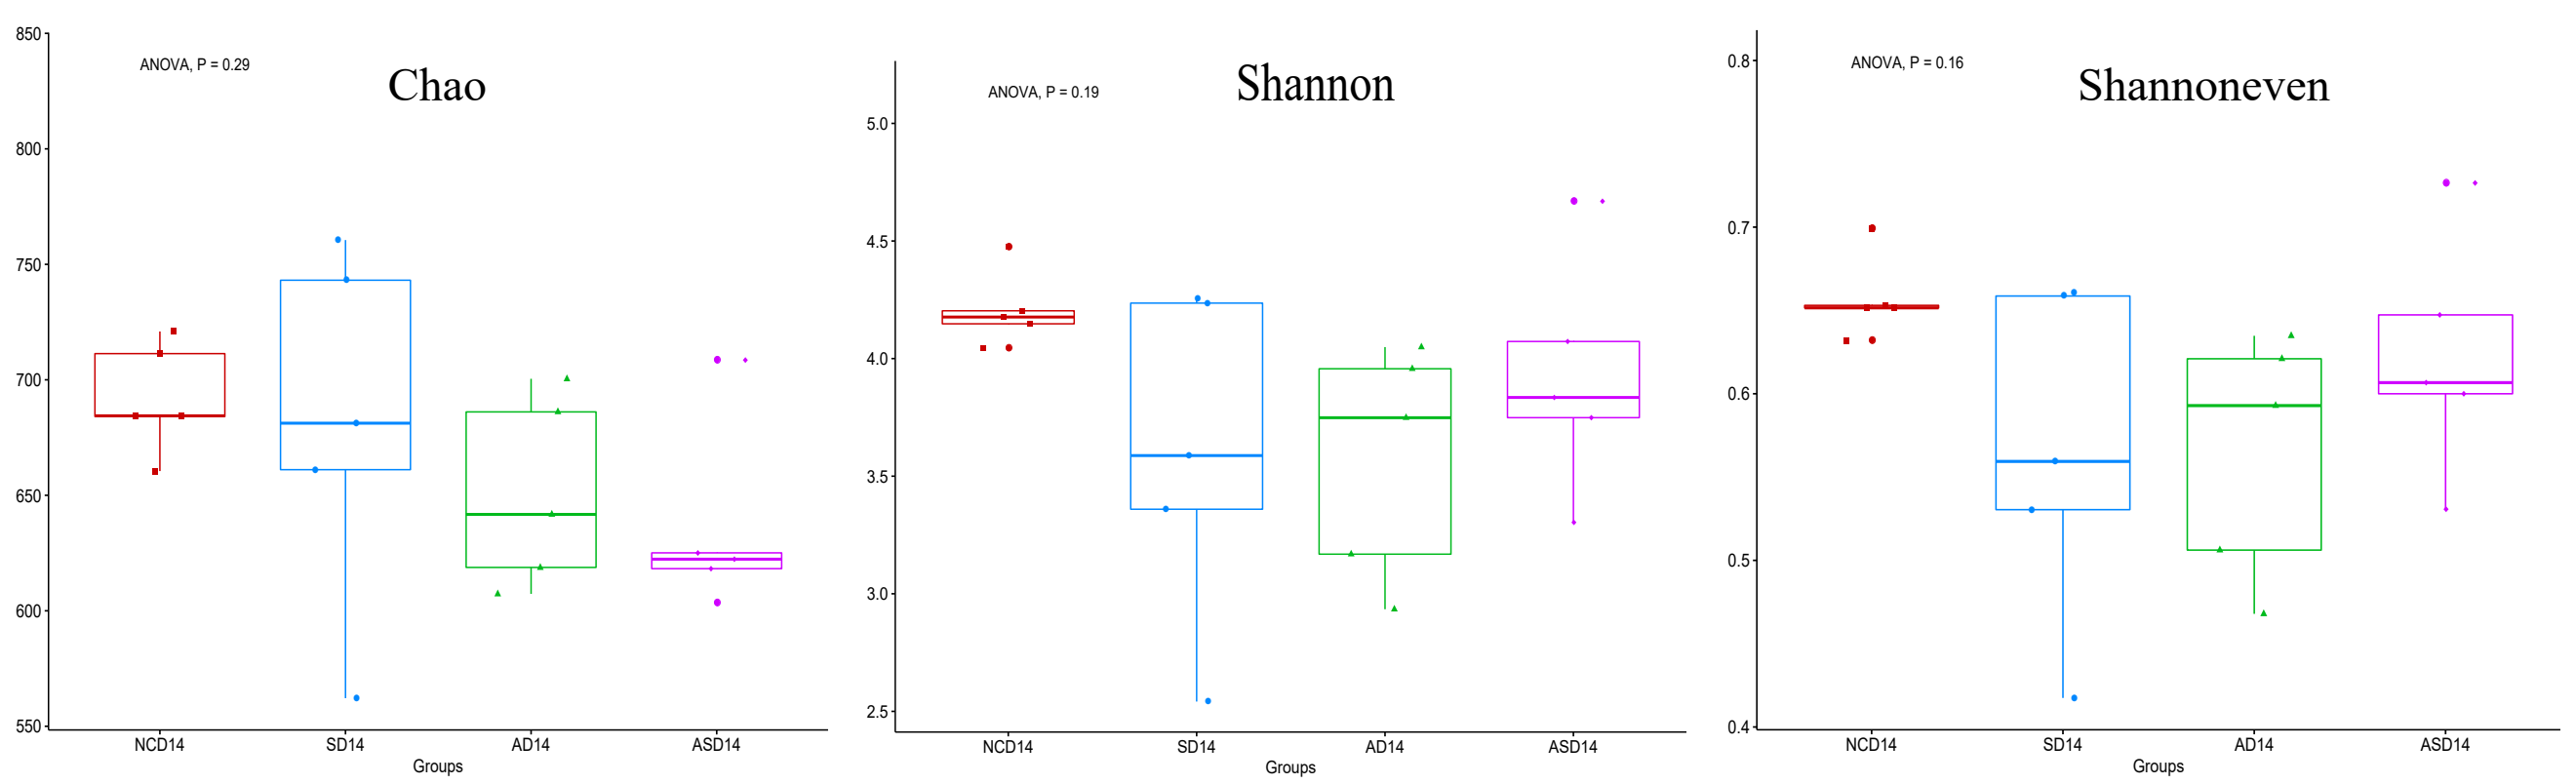

D

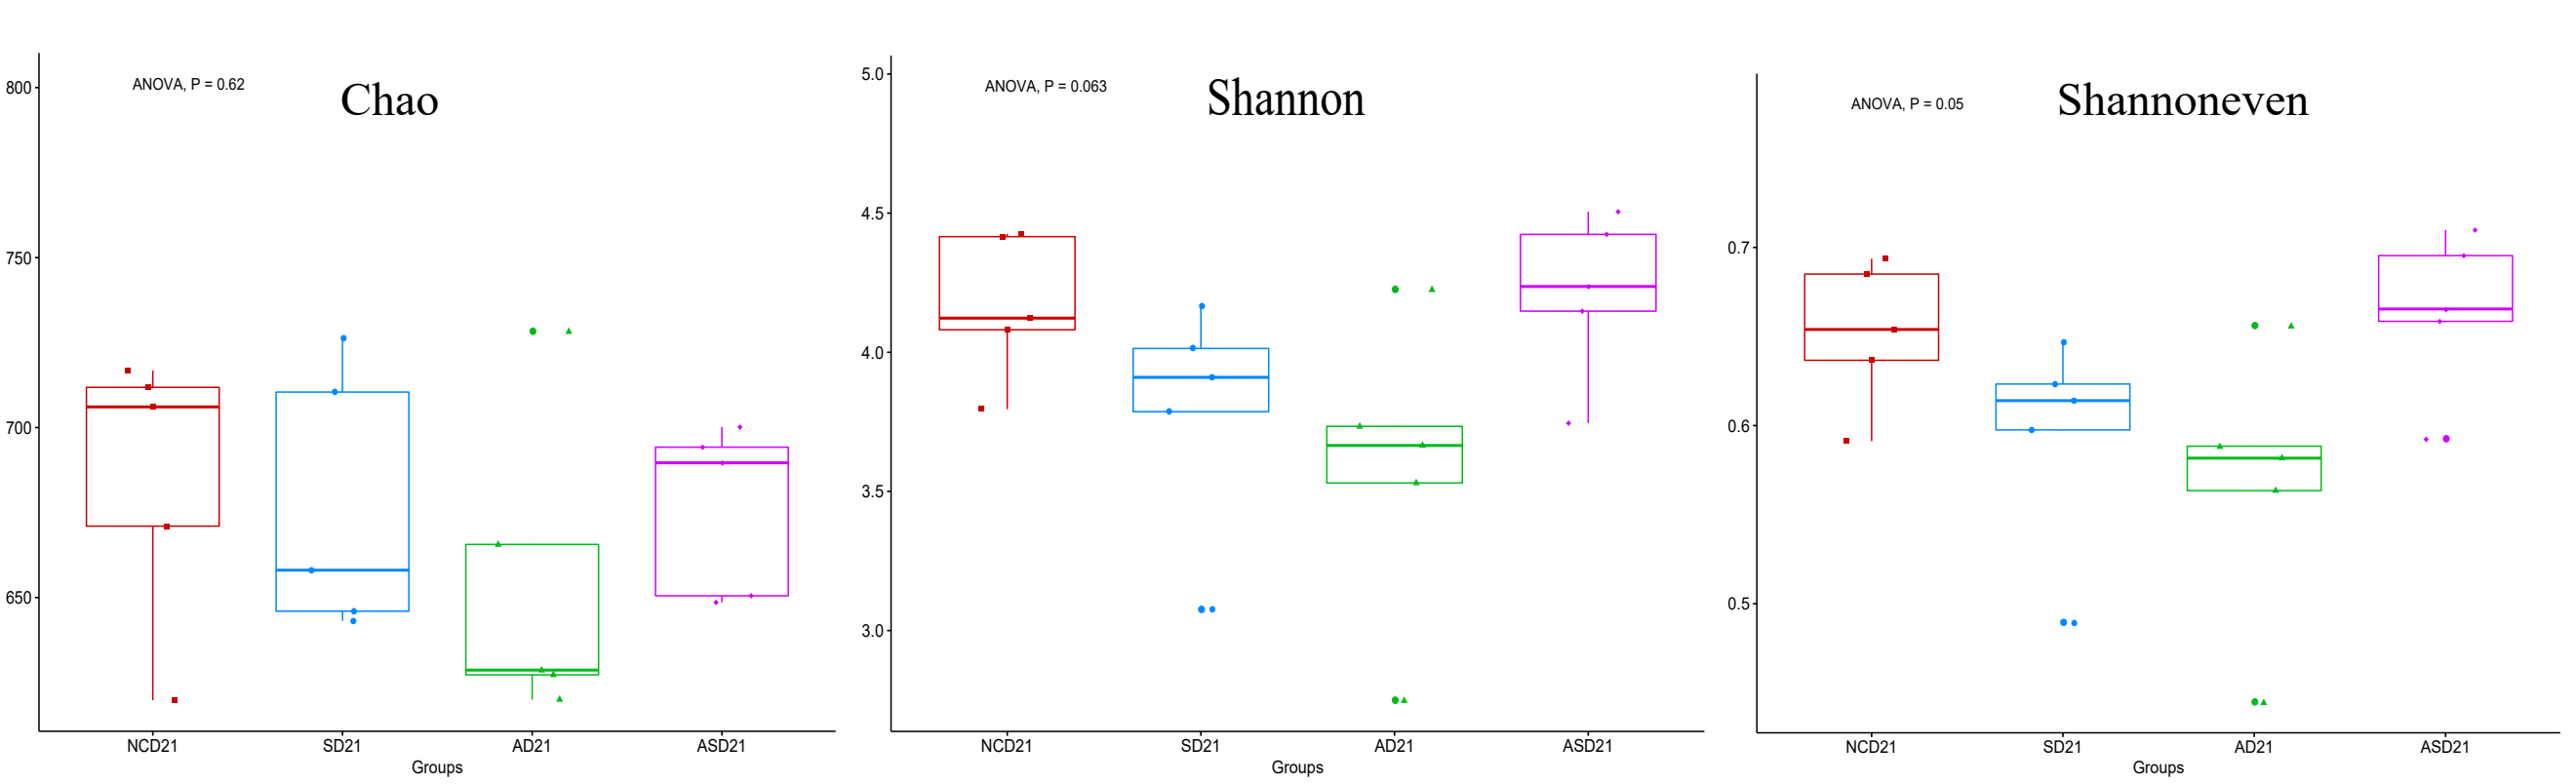

E

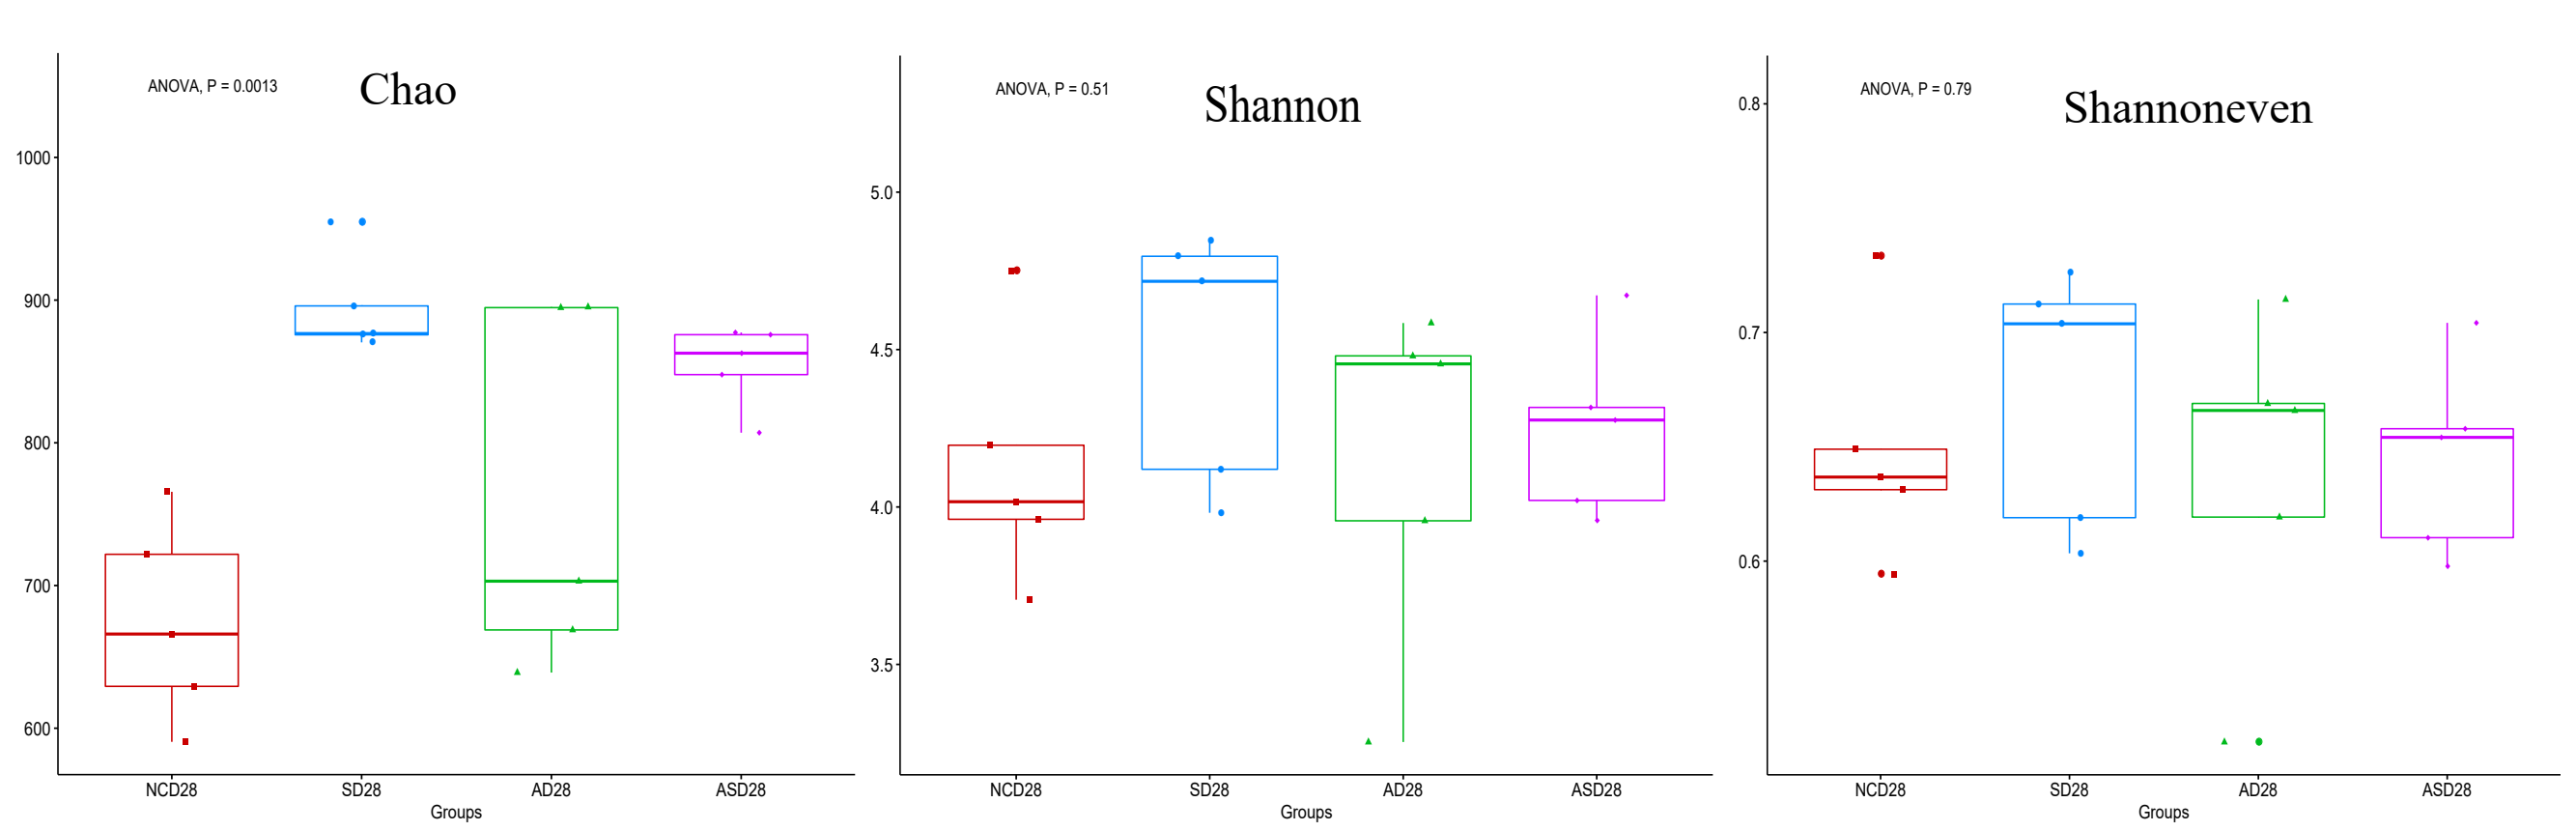

Supplement: s1 [file s1]
